# Supplementary material
Source: publisher figshare collection journal article supplement (https://scielo.figshare.com/articles/dataset/_/5772060)
Supplement: Supplementary file 1 [file Table_1.xls]

## Sheet: Table_1
<b>TRATAMENTO</b>	<b>DENSIDADE</b>	<b>UMIDADE</b>	<b>EXCITAÇÃO POR IMPULSO E ENSAIO DESTRTUTIVO</b>
Material novo	7 amostras	7 amostras	7 amostras
1<sup>a</sup> utilização	7 amostras	7 amostras	7 amostras
5<sup>a</sup> utilização	7 amostras	7 amostras	7 amostras
