# Supplementary material
Source: publisher figshare collection journal article supplement (https://scielo.figshare.com/articles/dataset/_/5772060)
Supplement: Supplementary file 2 [file Table_2.xls]

## Sheet: Table_2
<b>TRATAMENTO</b>	<b>UMIDADE (%)</b>	<b>DENSIDADE (g/cm<sup> <strong>-3</strong> </sup> )</b>
Material novo	12,89 ± 0,02	0,55 ± 0,02
1<sup>a</sup> utilização	13,78 ± 0,03	0,51 ± 0,01
5<sup>a</sup> utilização	13,98 ± 0,02	0,51± 0,02
